# Supplementary material for: Structural analysis of lecithin:cholesterol acyltransferase bound to high density lipoprotein particles
Source: PubMed Central journal article supplement (PMC6962161; doi:10.1038/s42003-019-0749-z), 2020-01-15
Supplement: 42003_2019_749_MOESM3_ESM.pdf [file 42003_2019_749_MOESM3_ESM.pdf]

*This manuscript has been previously reviewed at another Nature Research journal. This document only contains reviewer comments and rebuttal letters for versions considered at Communications Biology.*

REVIEWERS' COMMENTS:

Reviewer #1 (Remarks to the Author):

Adequately addressed all my original comments. Recommend acceptance.
